# Supplementary material for: KDM6B promotes PARthanatos via suppression of O6-methylguanine DNA methyltransferase repair and sustained checkpoint response
Source: PubMed Central journal article supplement — Nucleic Acids Res. 2022 Jun 1;50(11):6313–31. doi: 10.1093/nar/gkac471 (PMC9226499; doi:10.1093/nar/gkac471), 2022-06-01
Supplement: gkac471_supplemental_file.pdf [file gkac471_supplemental_file.pdf]

## Supplementary data

### **KDM6B promotes PARthanatos via suppression of O<sup>6</sup>-methylguanine DNA methyltransferase repair and sustained checkpoint response**

Mingming Yang<sup>#</sup>, Chenliang Wang<sup>#</sup>, Mi Zhou, Lei Bao, Yanan Wang, Ashwani Kumar,  
Chao Xing, Weibo Luo, Yingfei Wang<sup>\*</sup>

#### Supplementary Tables

Supplementary Table 1

Supplementary Table 2

#### Supplementary Figures

Supplementary Figure 1

Supplementary Figure 2

Supplementary Figure 3

Supplementary Figure 4

Supplementary Figure 5

Supplementary Figure 6

Supplementary Figure 7

Supplementary Figure 8

**Supplementary Table 1.****Sequences of sgRNAs, siRNAs, and primers for plasmid construction.**

|                                     |                                                                      |
|-------------------------------------|----------------------------------------------------------------------|
| KDM6Bg1                             | Forward: 5'-CACCGGGCGCCCCTGGAGCATAATA-3'                             |
|                                     | Reverse: 5'-AAACTATTATGCTCCAGGGGCGCCC-3'                             |
| KDM6Bg2                             | Forward: 5'-CACCGCATTTTCAGCTAACCAAGCCA-3'                            |
|                                     | Reverse: 5'-AAACTGGCTTGGTTAGCTGAAATGC-3'                             |
| KDM6Bg3                             | Forward: 5'-CACCGTACCACAGCGCCCTTCGATA-3'                             |
|                                     | Reverse: 5'-AAACTATCGAAGGGCGCTGTGGTAC-3'                             |
| MGMT-g2                             | Forward: 5'-CACCGTATCGAAGAGTCCCCGTGC-3'                              |
|                                     | Reverse: 5'-AAACGCACGGGGA ACTCTTCGATAC-3'                            |
| PARP-1<br>siRNA pool<br>(Dharmacon) | GAUUUCAUCUGGUGUGAUA                                                  |
|                                     | GAUUUCAUCUGGUGUGAUA                                                  |
|                                     | GAUUUCAUCUGGUGUGAUA                                                  |
|                                     | GAUUUCAUCUGGUGUGAUA                                                  |
| PARP1-g1                            | Forward: 5'-CACCGCGAGTCGAGTACGCCAAGAG-3'                             |
|                                     | Reverse: 5'-AAACCTCTTGGCGTACTCGACTCGC-3'                             |
| PARP1-g2                            | Forward: 5'-CACCGAAGTACGTGCAAGGGGTGTA-3'                             |
|                                     | Reverse: 5'-AAACTACACCCCTTGCACGTA CTTC-3'                            |
| XRCC1-g2                            | Forward: 5'-CACCGCTATGCAGCTGCTACCCTCC-3'                             |
|                                     | Reverse: 5'-AAACGGAGGGTAGCAGCTGCATAGC-3'                             |
| XRCC1-g3                            | Forward: 5'-CACCGCCCACTCCTTACGCACGATG-3'                             |
|                                     | Reverse: 5'-AAACCATCGTGCGTAAGGAGTGGGC-3'                             |
| MGMT (full<br>length)               | Forward: 5'-CCGGATGGATCCGCCACCATGCTGGGACAGCCCGCG-3'                  |
|                                     | Reverse: 5'-ACATACGAATTCTCAGTTTCGGCCAGCAGGCGGGG-3'                   |
| MGMT<br>(mutation)                  | Forward: 5'-CATCCCGGCCACAGAGTGGTCTGCAGCAGCG-3'                       |
|                                     | Reverse: 5'-ACTCTGTGGGCCGGGATGAGGATGGGGACAGGATTG-3'                  |
| KDM6B (full<br>length)              | Forward: 5'-<br>GCTCTAGA ACTAGTGGCCACCATGCATCGGGCAGTGGATCCT-3'       |
|                                     | Reverse: 5'-<br>GATAAGCTTGATATCTCGCGACGTGCTGGCTGGGGCCTGG-3'          |
| KDM6B-C                             | Forward: 5'-GTGAATTCCCCAAAAGAAGCGGAAAGTGCGCGCCA<br>GCAGGAATGCCAAG-3' |
|                                     | Reverse: 5'-<br>AACATGTTTCAGCGGCCGCTCATCGCGACGTGCTGGCTG-3'           |
| XRCC1                               | Forward: 5'-GGGTTTCATATGATGCCGGAGATCCGCC-3'                          |
|                                     | Reverse: 5'-GGCCGGAATTCTCAGGCTTGCGGCACC-3'                           |

**Supplementary Table 2. Sequences of qPCR primers**

| Name                                 | Sequence                                     |
|--------------------------------------|----------------------------------------------|
| MGMT                                 | Forward: 5'-AATGAGAGGCAATCCTGTCCC-3'         |
|                                      | Reverse: 5'-AGTCCTCCGGAGTAGTTGCC-3'          |
| M-MGMT                               | Forward: 5'-TTTCGACGTTTCGTAGGTTTTTCGC-3'     |
|                                      | Reverse: 5'-GCACTCTTCCGAAAACGAAACG-3'        |
| U-MGMT                               | Forward: 5'-TTTGTGTTTTGATGTTTGTAGGTTTTTGT-3' |
|                                      | Reverse: 5'-AACTCCACACTCTTCCAAAAACAAAACA-3'  |
| ACTIN                                | Forward: 5'-GAGCACAGAGCCTCGCCTTT-3'          |
|                                      | Reverse: 5'-TCATCATCCATGGTGAGCTGG-3'         |
| ACTG<br>(for genomic DNA)            | Forward: 5'-TGGTGATGGAGGAGGCTCAGCAAGT-3'     |
|                                      | Reverse: 5'-AGCCAATGGGACCTGCTCCTCCCTTGA-3'   |
| ACTB<br>(for DNA<br>methylation PCR) | Forward: 5'-TGGTGATGGAGGAGGTTTAGTAAGT-3'     |
|                                      | Reverse: 5'-AACCAATAAAACCTACTCCTCCCTTAA-3'   |
| JMJD3-C                              | Forward: 5'-CACGGTCAAATCAGCGACC-3'           |
|                                      | Reverse: 5'-AAACACCTCCACATCGCACT-3'          |
| JMJD3                                | Forward: 5'-CACCCACTGTGGTCTGTTGT-3'          |
|                                      | Reverse: 5'-CGCCTCAGTAACAGCCAGAT-3'          |
| ALKBH1                               | Forward: 5'-ACTCCACACTGGGAATCCAC-3'          |
|                                      | Reverse: 5'-TCCAAAGCTGAATGACAGCAAG-3'        |
| ALKBH2                               | Forward: 5'-AAGGGGGCCTTTTGAGGAAG-3'          |
|                                      | Reverse: 5'-TGGCCAGTGCTCCTGTAAAAT-3'         |
| ALKBH3                               | Forward: 5'-GCCACGAGTGATTGACAGAG-3'          |
|                                      | Reverse: 5'-TTCACGTCAACAAAGCCAGG-3'          |
| ALKBH4                               | Forward: 5'-CCCAGCGAAAACATACCGTT-3'          |
|                                      | Reverse: 5'-CGGGTCACAAAGTCCTCGAT-3'          |
| ALKBH5                               | Forward: 5'-GTGGACCCCATCCACATCTT-3'          |
|                                      | Reverse: 5'-ATCAGCAGCATATCCACTGAGC-3'        |
| ALKBH6                               | Forward: 5'-TGGACGGATTGGGTGCAAG-3'           |
|                                      | Reverse: 5'-GATTACAGGTGGTGCCTGCT-3'          |
| ALKBH7                               | Forward: 5'-GGCTGGAACCTTTGCTGGAG-3'          |
|                                      | Reverse: 5'-TCCCGAAGGATCTCATGGGAG-3'         |

|        |                                     |
|--------|-------------------------------------|
| ALKBH8 | Forward: 5'-TGCAACAGCAGAGCGTAGAG-3' |
|        | Reverse: 5'-AAATGAGTGCCTTCCCACCT-3' |
| ALKBH9 | Forward: 5'-CTGTGAAGGCCCTGAAGAGG-3' |
|        | Reverse: 5'-AAGGGGTATCGCCAAACCAG-3' |
| MPG    | Forward: 5'-CGTCCATCGTCAGACGTGAT-3' |
|        | Reverse: 5'-GTCGGCAAACCTGCTTTGGT-3' |
| APE1   | Forward:5'-ACGGCATAGGCGATGAGGAG-3'  |
|        | Reverse:5'-TGCGAAAGGCTTCATCCCAG-3'  |

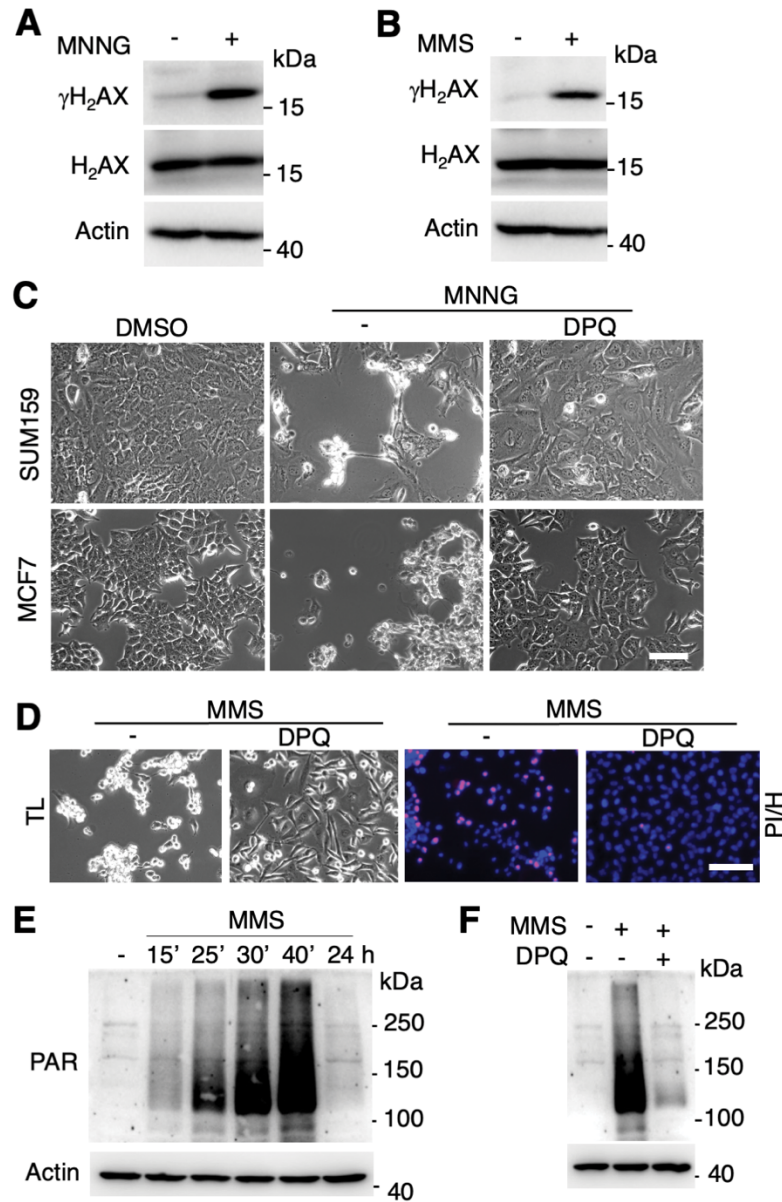

**Supplementary Figure 1. PARP-1 is required for alkylating agent-induced cell death in different types of cancer cells.** (A and B) Immunoblot analysis of DNA damage in HeLa cells 6 h after the treatment with vehicle (-), MNNG (50  $\mu$ M, 15 min), or MMS (2 mM, 6 h). (C) Representative cell death images from SUM159 and MCF-7 cells treated with DMSO, MNNG (200  $\mu$ M for SUM159 and 500  $\mu$ M for MCF7), MNNG plus DPQ (30  $\mu$ M) for 24 h. Scale bar, 20  $\mu$ m. (D) Representative cell death images in MDA-MB-231 cells treated with MMS and/or DPQ for 24 h. Scale bar, 20  $\mu$ m. TL, transmission light. PI/H, propidium iodide/Hoechst staining. (E) Immunoblot analysis of PARP-1 activation in MDA-MB-231 cells treated with vehicle (-) or MMS (2 mM) for indicated time. (F) Immunoblot analysis of PARP-1 activation in MDA-MB-231 cells treated with vehicle (-) or MMS for 1 h in the presence or absence of DPQ.

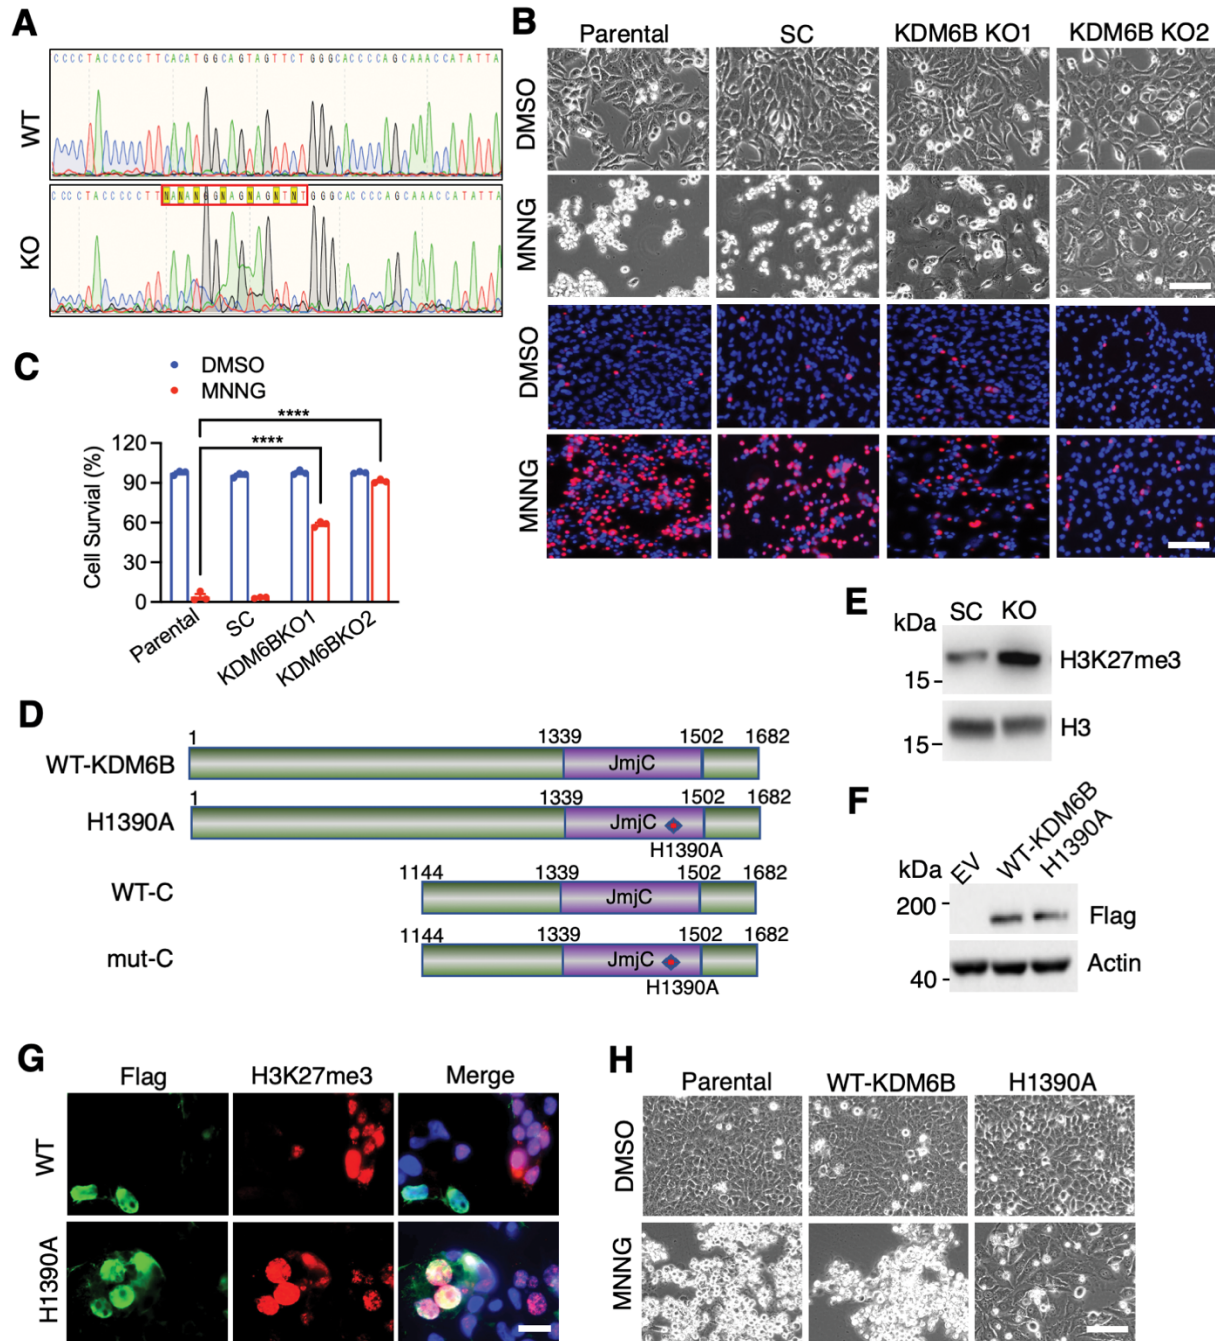

**Supplementary Figure 2. Loss of KDM6B or its H3K27 demethylase activity blocks PARthanatos induced by alkylating agent MNNG.** (A) Genotyping of KDM6B KO1 HeLa cells. A 17-nt deletion/shift was found in one allele of *KDM6B* gene. (B and C) Representative images and quantification of MNNG (50  $\mu$ M, 15 min)-induced cell death in WT and KDM6B KO cells, which was established by sgRNAs targeting to different regions of *KDM6B* (mean  $\pm$  SEM,  $n = 3$ ). \*\*\*\* $p < 0.0001$  by two-way ANOVA Sidak's multiple comparisons test. Scale bar, 20  $\mu$ m. (D) Schematic diagrams of human full-length and C-terminal KDM6B and their demethylase inactive H1390A mutant variants. Numbers in the diagrams correspond to the positions of amino acid

residues. JmjC, jumonji C domain; WT, wild type; mut, mutant; C, C-terminal. **(E)** Expression of H3K27me3 in SC and KDM6B KO cells. **(F)** Expression of full-length Flag-tagged WT-KDM6B and demethylase inactive KDM6B H1390A mutant in HeLa cells. **(G)** Expression of H3K27me3 (red) and Flag-tagged WT and H1390A KDM6B (green) in HeLa cells overexpressed WT or H1390A mutant KDM6B. Blue indicates DAPI staining. Scale bar, 20  $\mu\text{m}$ . **(H)** PARthanatos induced by MNNG in HeLa cells overexpressing WT or H1390A mutant KDM6B. Scale bar, 20  $\mu\text{m}$ .

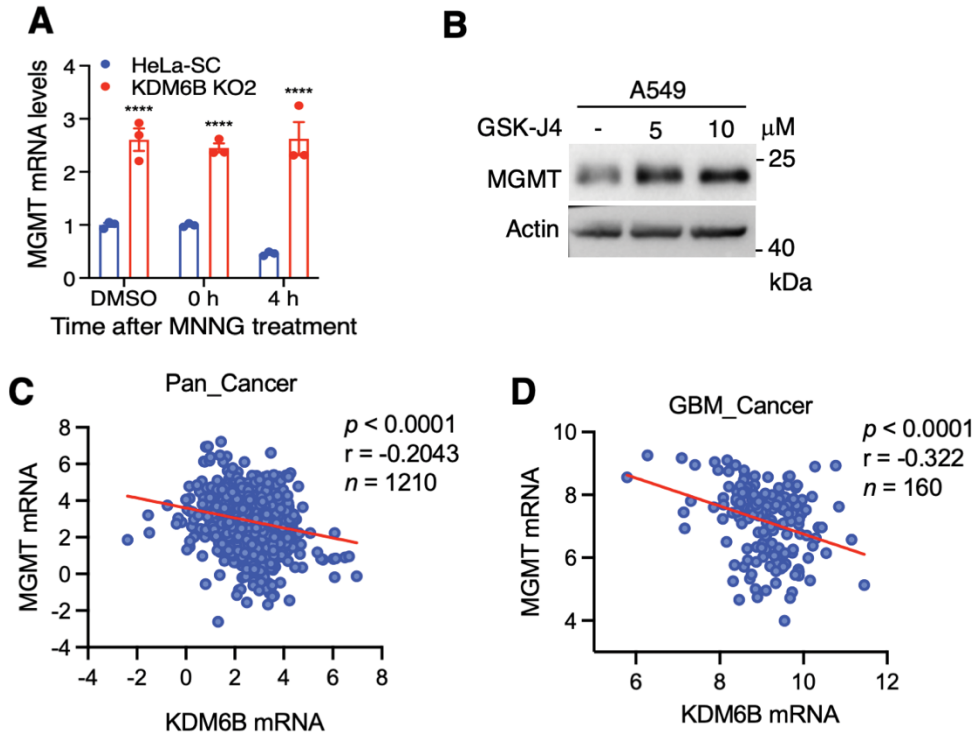

**Supplementary Figure 3. KDM6B negatively regulates MGMT expression.** (A) RT-qPCR analysis of MGMT mRNA in SC and KDM6B KO2 HeLa cells treated with DMSO or MNNG for 15 min, followed by recovery for 0 and 4 h (mean  $\pm$  SEM,  $n = 3$ ). \*\*\*\* $p < 0.0001$  by two-way ANOVA Sidak's multiple comparisons test. (B) Immunoblot analysis of MGMT in A549 cells treated with or without GSK-J4 for 24 h. (C and D) A negative correlation of KDM6B with MGMT mRNA expression in 1210 human pan tumors (C) and 160 GBM tumors (D). Data were retrieved from the TCGA cohort at cBioPortal. "r" represents Pearson correlation coefficient of MGMT vs KDM6B expression.  $-0.4 < r < -0.2$  is considered as a moderate negative correlation.



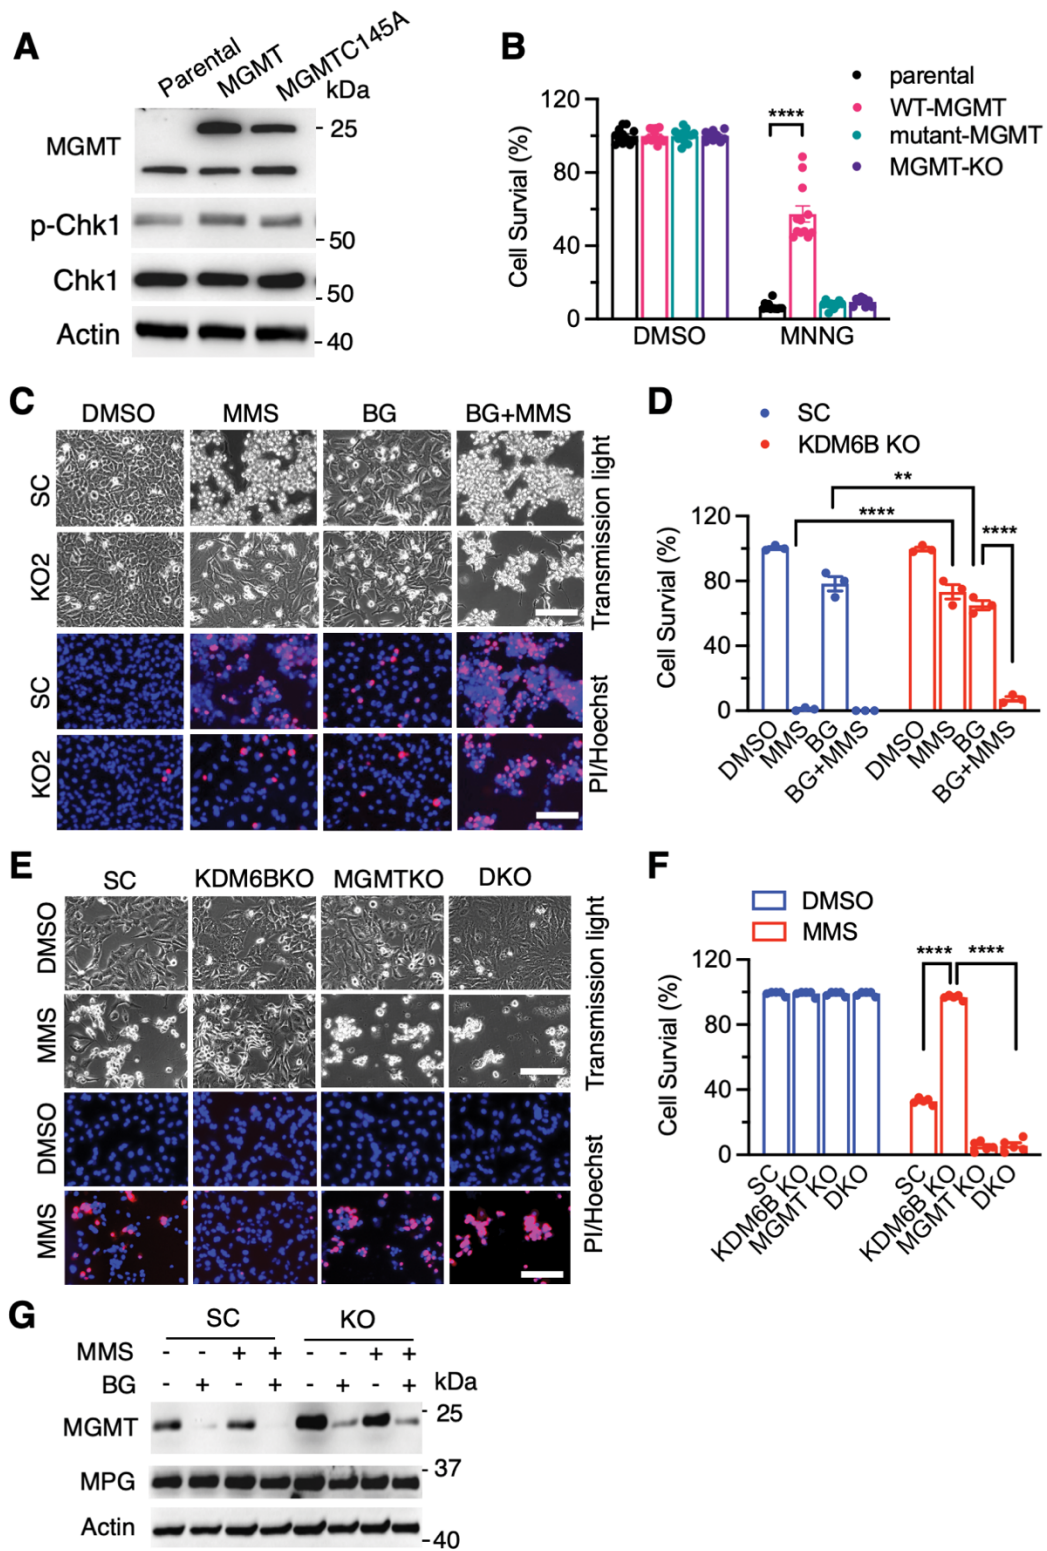

**Supplementary Figure 4. MGMT inhibition overcomes alkylating agent resistance in KDM6B KO cells.** (A) Expression of MGMT and its methyltransferase inactive mutant C145A MGMT in HeLa cells. (B) Effects of MGMT, mutant C145A MGMT and MGMT KO on MNNG

(50  $\mu$ M, 15 min)-induced cell death (mean  $\pm$  SEM,  $n = 9-12$ ). \*\*\*\* $p < 0.0001$  by two-way ANOVA Tukey's multiple comparisons test. **(C and D)** Representative cell death images and quantification of cell death in SC and KDM6B KO2 HeLa cells 24 h after the treatment with MMS (2 mM, 1 h) and/or BG (200  $\mu$ M) (mean  $\pm$  SEM,  $n = 3$ ). \*\* $p < 0.01$ , \*\*\*\* $p < 0.0001$  by two-way ANOVA Sidak's multiple comparisons test. **(E and F)** Representative cell death images (E) and quantification of cell death (F) in SC, KDM6B KO2, MGMT KO and KDM6B/MGMT DKO HeLa cells 24 h after the treatment with MMS (2 mM, 1 h) (mean  $\pm$  SEM,  $n = 5$ ). \*\*\*\* $p < 0.0001$  by two-way ANOVA Sidak's multiple comparisons test. Scale bar, 20  $\mu$ m. **(G)** Protein expression of MGMT and MPG 6 h after the treatment of MMS (2 mM, 1 h) and BG (200  $\mu$ M).

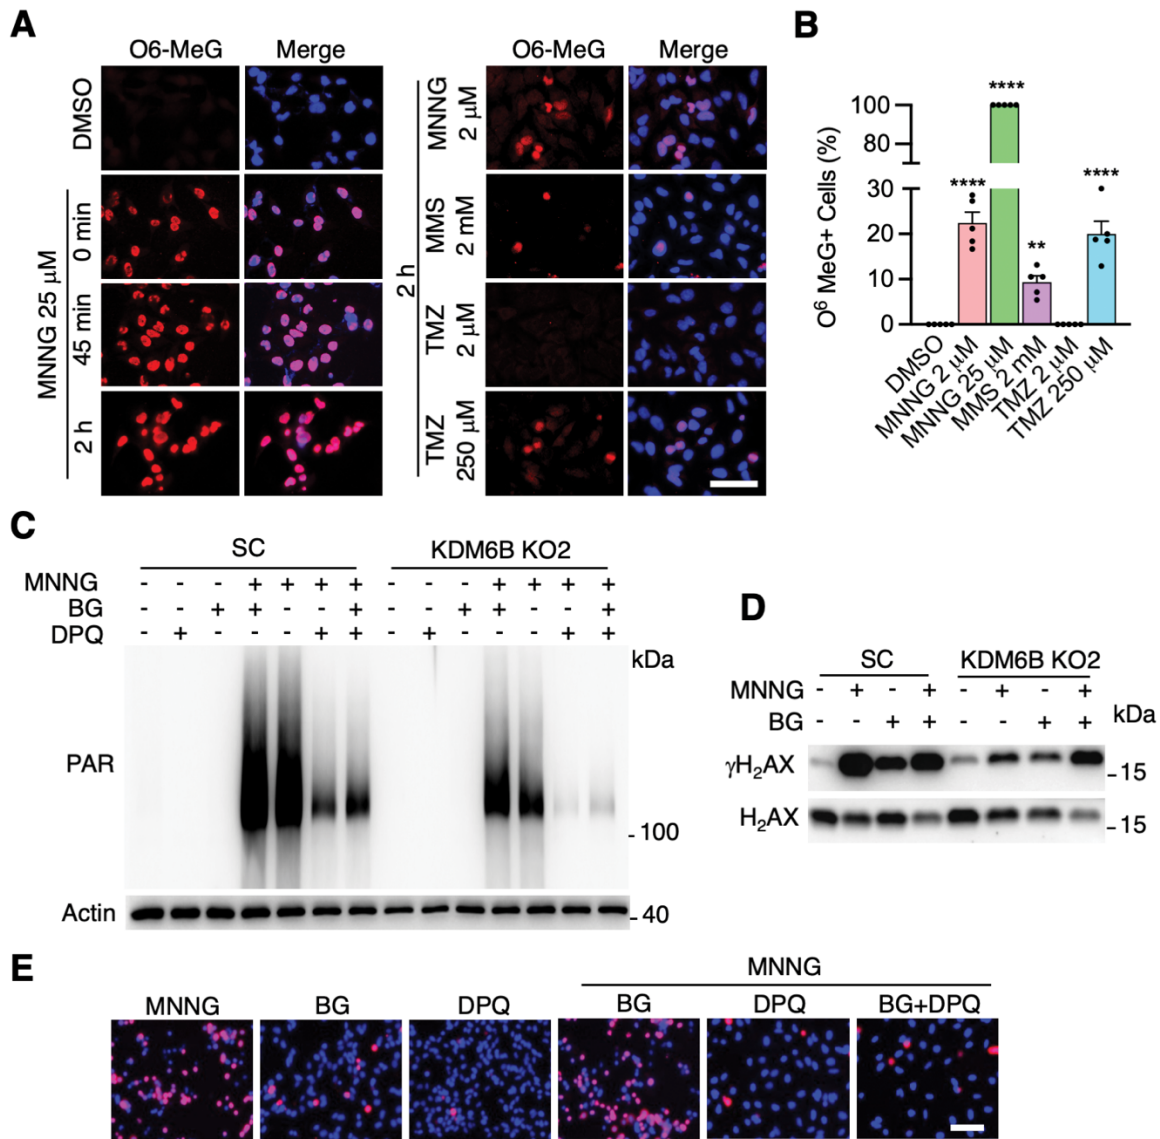

**Supplementary Figure 5. Effects of alkylating agents on O<sup>6</sup> MeG formation and effects of PARP inhibition on alkylating agent-induced PAR formation and cell death in the presence or absence of MGMT inhibitor BG. (A)** Representative images of O<sup>6</sup> MeG staining in SC cells at 0 min, 45 min and 2 h post treatment of different alkylating agents at the indicated concentrations. **(B)** O<sup>6</sup> MeG+ cell quantification in SC cells at 2 h post treatment of different alkylating agents at the indicated concentrations. \*\**p* < 0.01, \*\*\*\**p* < 0.0001 by one-way ANOVA Dunnett's multiple comparisons test. **(C)** Immunoblot analysis of PARP-1 activation in SC and KDM6B KO2 HeLa cells treated with MNNG (50  $\mu$ M), BG (200  $\mu$ M, 24 h pre-treatment), and/or DPQ (30  $\mu$ M, 30 min pre-treatment) for 15 min. **(D)** Immunoblot analysis of DNA damage in SC and KDM6B KO2 HeLa cells 6 h after MNNG in the presence or absence of 24 h BG pretreatment. **(E)** Representative cell death images in HeLa cells 24 h after treatment of MNNG, BG, and/or DPQ. Scale bar, 20  $\mu$ m.

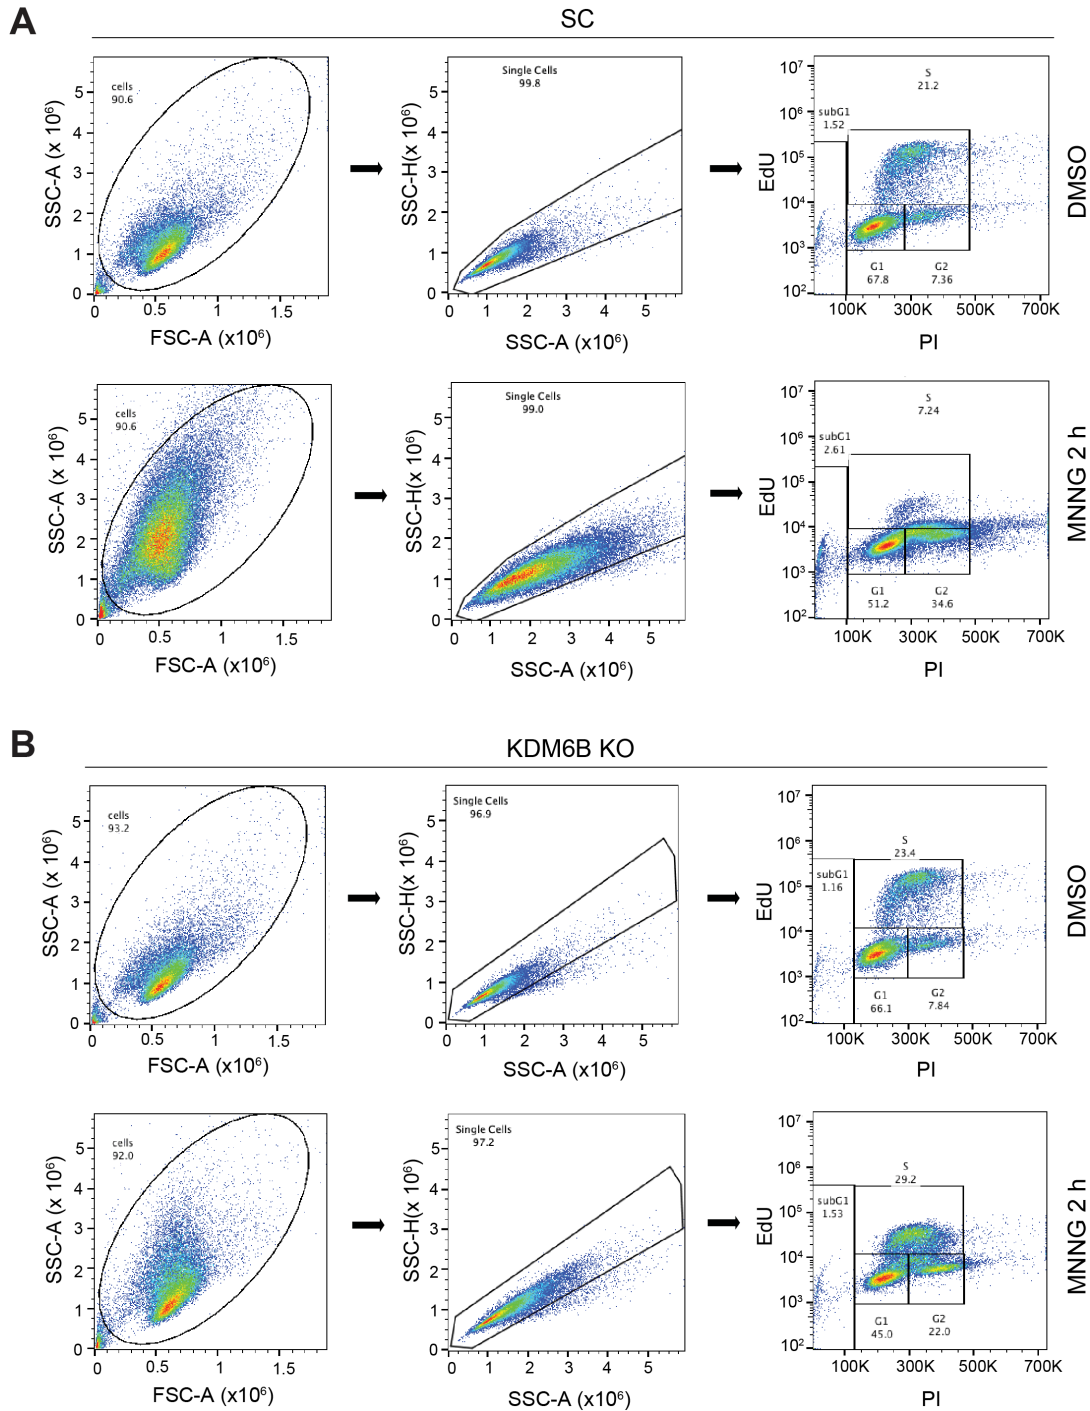

**Supplementary Figure 6. Flow cytometry gating strategy for HeLa cell cycle analysis.** (A and B) All cells were labeled with 10  $\mu$ M EdU at 37°C for 2 hours right before fixation and further conjugated to Alexa Fluor 488 azide. First, cell debris was excluded from living cells in the forward scatter (FCS-A) vs side scatter (SSC-A) plot. Then single cells were selected within the population in the SSC-A vs SSC-H plot and applied to Propidium Iodide (PI) vs EdU histogram plot to identify G1, S and G2/M phases. Both SC (A) and KDM6B KO (B) cells at 2 h post treatment of DMSO or MNNG (50  $\mu$ M, 15 min) were shown as examples.

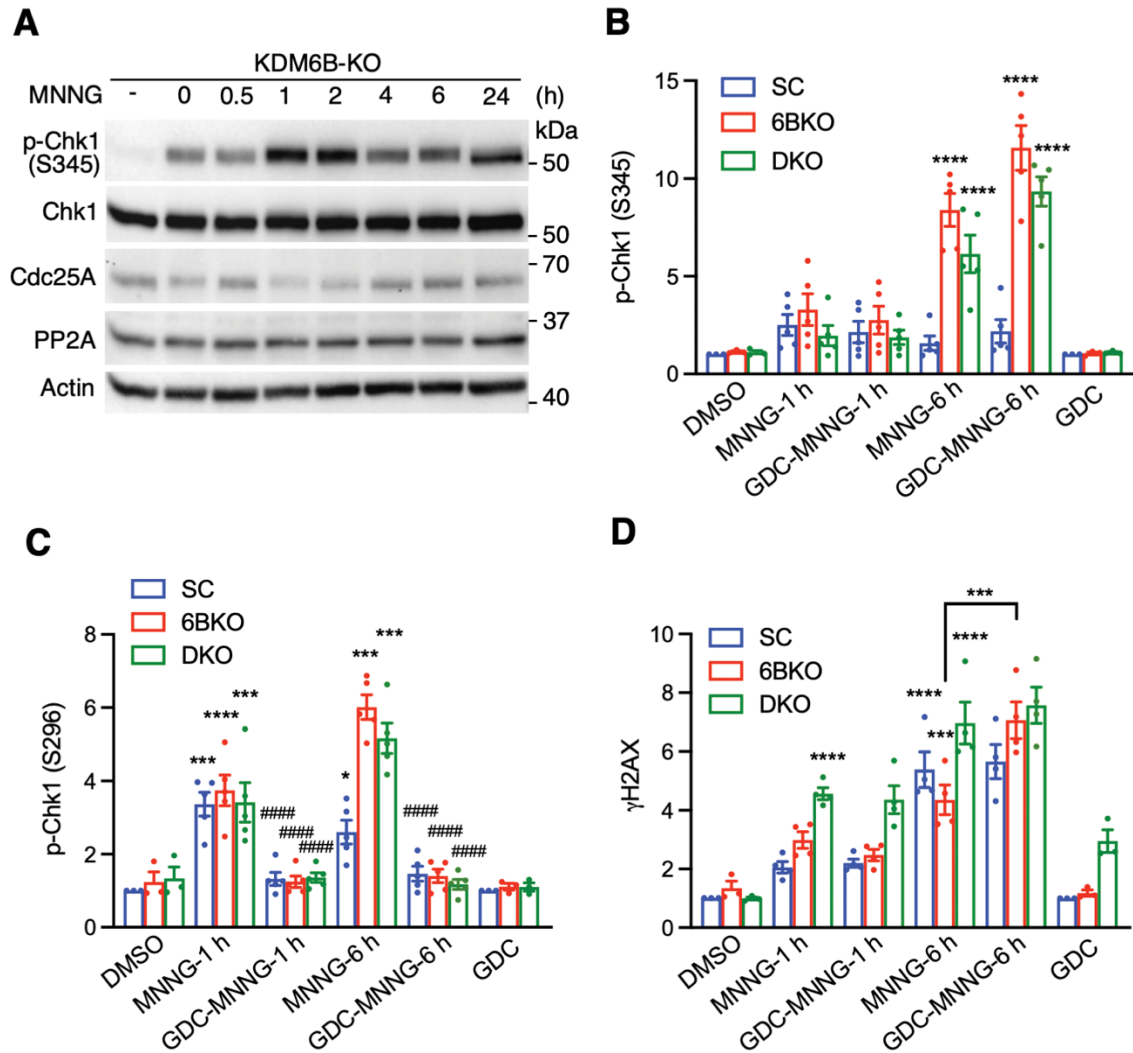

**Supplementary Figure 7. KDM6B KO promotes sustained Chk1 activation following alkylating agent treatment.** (A) Immunoblot analysis of checkpoint response in KDM6B KO2 HeLa cells 0-24 h after MNNG (50  $\mu$ M, 15 min) treatment. (B-D) Quantification of checkpoint response and DNA damage in SC, KDM6B KO2 (6BKO), and KDM6B/MGMT DKO HeLa cells 1 h and 6 h after MNNG treatment with or without checkpoint inhibitor GDC0575 (50 nM). \*\*\* $p < 0.001$ , \*\*\*\* $p < 0.0001$  vs its own DMSO control or two groups as indicated, ##### $p < 0.0001$  vs its own MNNG treatment without checkpoint inhibitor GDC0575 at the same timepoint, by one-way ANOVA Sidak's multiple comparisons test.

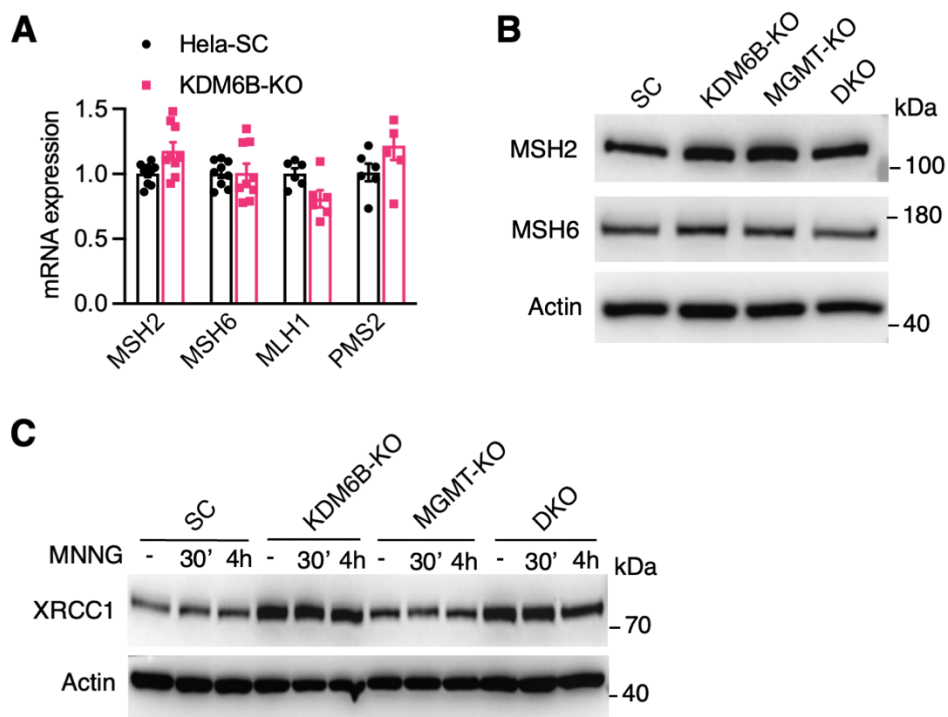

**Supplementary Figure 8. Effects of KDM6B KO on expression of DNA repair proteins involved in the MMR and BER.** (A) mRNA expression of MSH2, MSH6, MLH1 and PMS2 in SC and KDM6B KO HeLa cells. (B) Protein expression of MSH2 and MSH6 in SC and KDM6B KO HeLa cells. (C) Protein expression of XRCC1 in SC, KDM6B KO, MGMT KO and KDM6B/MGMT DKO HeLa cells.
